# Supplementary material
Source: Springer Nature journal article supplement (https://www.springermedizin.de/resource/supplementary/12987_2007_290_MOESM1_ESM.pdf/9611728)

IIFL reduction (ng/L)

20000  
15000  
10000  
5000  
0  
-5000  
-10000

$r = 0.39, p = 0.03$

-0,5 0 0,5 1 1,5 2 2,5 3

Improvement in gait performance index

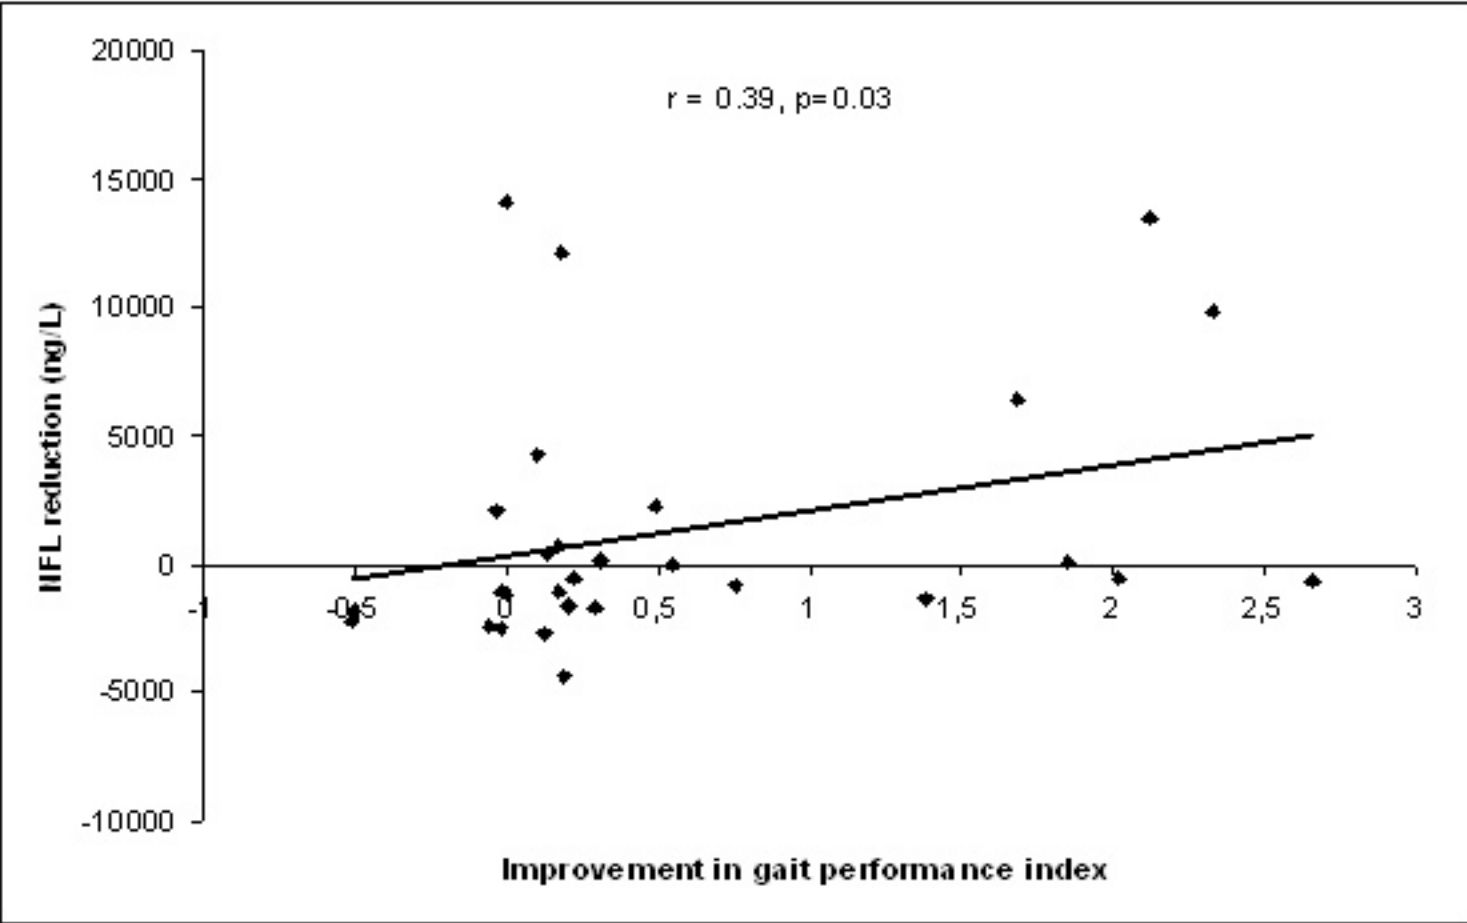

Supplement: MOESM1 [file 9611728]
